# Supplementary material for: Synthesis of La-Fe3O4@polydopamine core–shell magnetic composites for enhanced phosphate removal from aqueous solutions
Source: Royal Society of Chemistry journal article supplement (doi:10.1039/d6ra00725b), 2026-05-11
Supplement: d6ra00725b1.pdf [file d6ra00725b1.pdf]

## Supporting Information

### **Synthesis of La-Fe<sub>3</sub>O<sub>4</sub>@Polydopamine Core-Shell Magnetic Composites for Enhanced Phosphate Removal from Aqueous Solutions**

Xinyu Cheng<sup>‡</sup>, <sup>a,b</sup> Zihua Xu<sup>‡</sup>, <sup>a,c</sup> Chenxi Guo,<sup>a</sup> Ting Zhou,<sup>a,c</sup> Alang Zhang<sup>a</sup> and Feng Shi<sup>†\*a</sup>

---

<sup>a</sup> College of Life Sciences, Shihezi University.

<sup>b</sup> Xinjiang Production and Construction Corps Key Laboratory of Oasis Town and Mountain-basin System Ecology.

<sup>c</sup> Key Laboratory of Xinjiang Phytomedicine Resource Utilization, Ministry of Education.

<sup>†</sup> Shi Feng: [shifeng2314@yeah.net](mailto:shifeng2314@yeah.net)

<sup>‡</sup> Equal contribution.

**Table S1** XPS quantitative analysis results of 2.5%La-Fe<sub>3</sub>O<sub>4</sub> particles at different etching depths

| Etch depth (nm) | La atomic percentage (%) | Fe atomic percentage (%) | La/Fe atomic ratio (%) |
|-----------------|--------------------------|--------------------------|------------------------|
| 0               | 0.10                     | 5.20                     | 1.92                   |
| 30              | 0.21                     | 18.29                    | 1.15                   |
| 60              | 0.33                     | 22.19                    | 1.49                   |

**Table S2** Room-temperature magnetic parameters of Fe<sub>3</sub>O<sub>4</sub> and 2.5%La-Fe<sub>3</sub>O<sub>4</sub>@PDA

| Sample                                     | Saturation magnetization $M_s$<br>(emu g <sup>-1</sup> ) | Remanent magnetization $M_r$<br>(emu g <sup>-1</sup> ) | Coercivity $H_c$ (Oe) |
|--------------------------------------------|----------------------------------------------------------|--------------------------------------------------------|-----------------------|
| Fe <sub>3</sub> O <sub>4</sub>             | 62.72                                                    | 1.90                                                   | 37.56                 |
| 2.5%La-Fe <sub>3</sub> O <sub>4</sub> @PDA | 43.72                                                    | 2.18                                                   | 67.37                 |

Measurement conditions: Room temperature (~295 K), field range ±20 kOe.

**Table S3** Kinetics adsorption parameters of phosphate by 2.5%La-Fe<sub>3</sub>O<sub>4</sub>@PDA

| Model               | Parameter                                                                   |         |
|---------------------|-----------------------------------------------------------------------------|---------|
| Pseudo-First Order  | C <sub>0</sub> (mg P L <sup>-1</sup> )                                      | 100     |
|                     | q <sub>e</sub> <sup>exp</sup> (mg P g <sup>-1</sup> )                       | 123.44  |
|                     | k <sub>1</sub> ×10 <sup>-3</sup> (min <sup>-1</sup> )                       | 7.18    |
|                     | q <sub>e</sub> <sup>cal</sup> (mg P g <sup>-1</sup> )                       | 51.90   |
|                     | R <sup>2</sup>                                                              | 0.97167 |
| Pseudo-Second Order | k <sub>2</sub> ×10 <sup>-4</sup> (g·mg P <sup>-1</sup> ·min <sup>-1</sup> ) | 4.209   |
|                     | q <sub>e</sub> <sup>cal</sup> (mg P g <sup>-1</sup> )                       | 126.74  |
|                     | R <sup>2</sup>                                                              | 0.99958 |

**Table S4** The D-R, Freundlich, and Sips isotherm parameters for the adsorption of phosphate by 2.5%La-Fe<sub>3</sub>O<sub>4</sub>@PDA

| Model            | Parameter                               |                        |
|------------------|-----------------------------------------|------------------------|
| D-R model        | qd (mol g <sup>-1</sup> )               | 4.75×10 <sup>-3</sup>  |
|                  | Kd (mol <sup>2</sup> kJ <sup>-2</sup> ) | 4.242×10 <sup>-4</sup> |
|                  | Ed (kJ mol <sup>-1</sup> )              | 34.32                  |
|                  | R <sup>2</sup>                          | 0.94588                |
| Freundlich model | K (mg g <sup>-1</sup> )                 | 1.216                  |
|                  | n                                       | 1.221                  |
|                  | R <sup>2</sup>                          | 0.91234                |
| Sips model       | β                                       | 3.886                  |
|                  | b [L (mg P) <sup>-1</sup> ]             | 2.208×10 <sup>-2</sup> |
|                  | R <sup>2</sup>                          | 0.97711                |

**Table S5** XPS binding energies and spectral parameters of 2.5%La-Fe<sub>3</sub>O<sub>4</sub>@PDA before and after phosphate adsorption

| Sample            | La 3d <sub>5/2</sub> BE (eV) | La 3d <sub>5/2</sub> satellite BE (eV) | ΔE (eV) | Satellite/main intensity ratio | Fe 2p <sub>3/2</sub> BE (eV) | P 2p BE (eV) |
|-------------------|------------------------------|----------------------------------------|---------|--------------------------------|------------------------------|--------------|
| Before adsorption | 835.1                        | 838.4                                  | 3.3     | 0.44                           | 710.5                        | -            |
| After adsorption  | 835.6                        | 839.0                                  | 3.4     | 0.51                           | 710.5                        | 133.6 (weak) |

**Table S6** Comparison of adsorption capacities among different adsorbents for phosphate

| Adsorbent                                           | Adsorption capacity (mg P g <sup>-1</sup> ) | Equilibrium Time (min) | References |
|-----------------------------------------------------|---------------------------------------------|------------------------|------------|
| ACF-ZrFe                                            | 26.3                                        | 900                    | 1          |
| Al-modified biochar                                 | 57.49                                       | 1440                   | 2          |
| Fe-Mn-La tri-metal composite sorbent                | 61.80                                       | 600                    | 3          |
| Fe <sub>3</sub> O <sub>4</sub> @La(OH) <sub>3</sub> | 63.72                                       | 20                     | 4          |
| La-Fe-CSR                                           | 74.87                                       | 120                    | 5          |
| Zr@CSQ beads                                        | 142.95                                      | 60                     | 6          |
| 2.5%La-Fe <sub>3</sub> O <sub>4</sub> @PDA          | 123.44                                      | 180                    | This study |

**Table S7** Estimated raw material cost for the synthesis of 2.5% La-Fe<sub>3</sub>O<sub>4</sub>@PDA (per gram of product)

| Raw material                                         | Amount (g) | Unit price (USD g <sup>-1</sup> ) | Cost (USD) |
|------------------------------------------------------|------------|-----------------------------------|------------|
| FeCl <sub>3</sub> ·6H <sub>2</sub> O                 | 0.425      | 0.024                             | 0.0102     |
| NaOAc                                                | 0.75       | 0.0148                            | 0.0111     |
| EDTA-2Na                                             | 0.02125    | 0.0149                            | 0.00032    |
| La(NO <sub>3</sub> ) <sub>3</sub> ·6H <sub>2</sub> O | 0.00675    | 0.0322                            | 0.00022    |
| Dopamine hydrochloride                               | 0.025      | 0.8926                            | 0.0223     |
| Total                                                |            |                                   | 0.0441     |

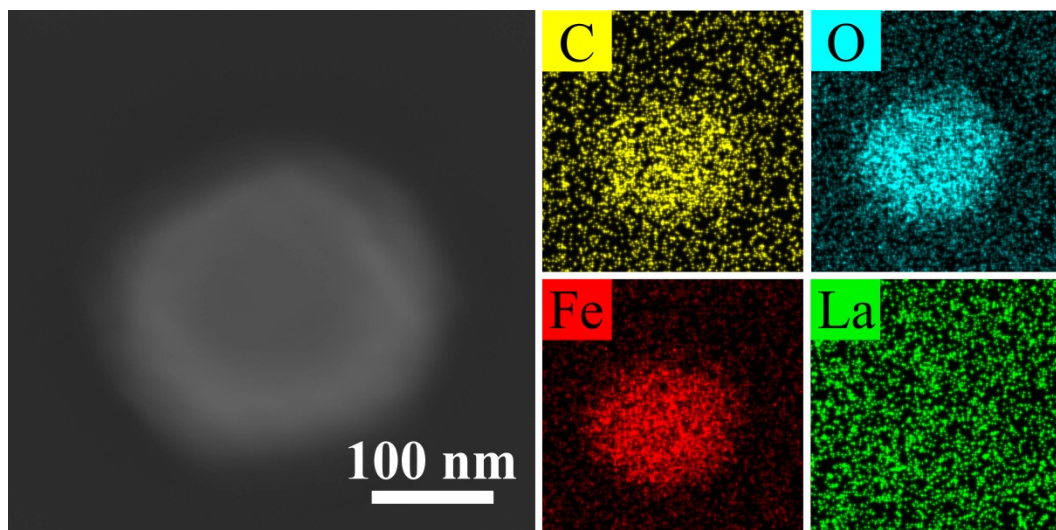

Fig. S1 Elemental mapping of La-Fe<sub>3</sub>O<sub>4</sub>.

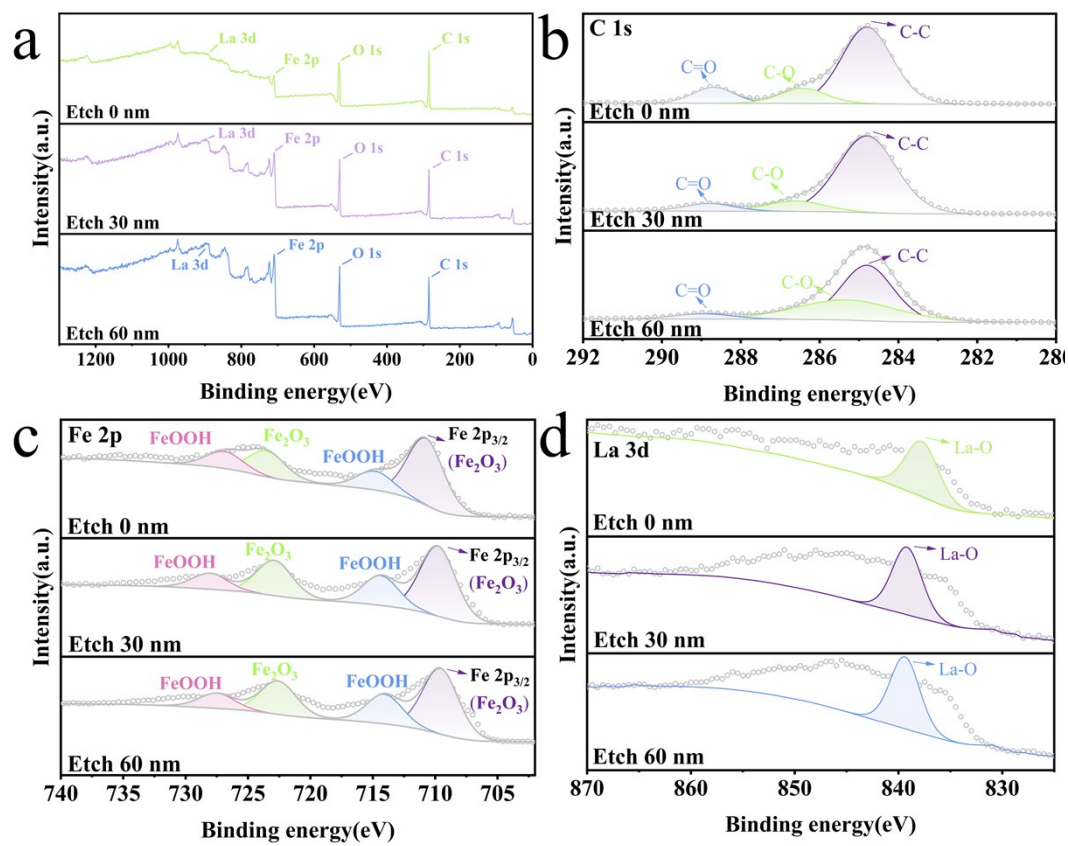

Fig. S2 High-resolution XPS spectra of 2.5%La-Fe<sub>3</sub>O<sub>4</sub> particles at different etching depths.

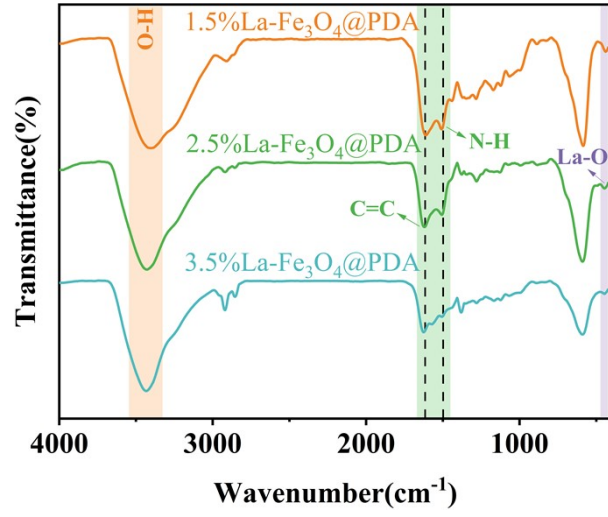

Fig. S3 FT-IR spectra of different La doping ratios.

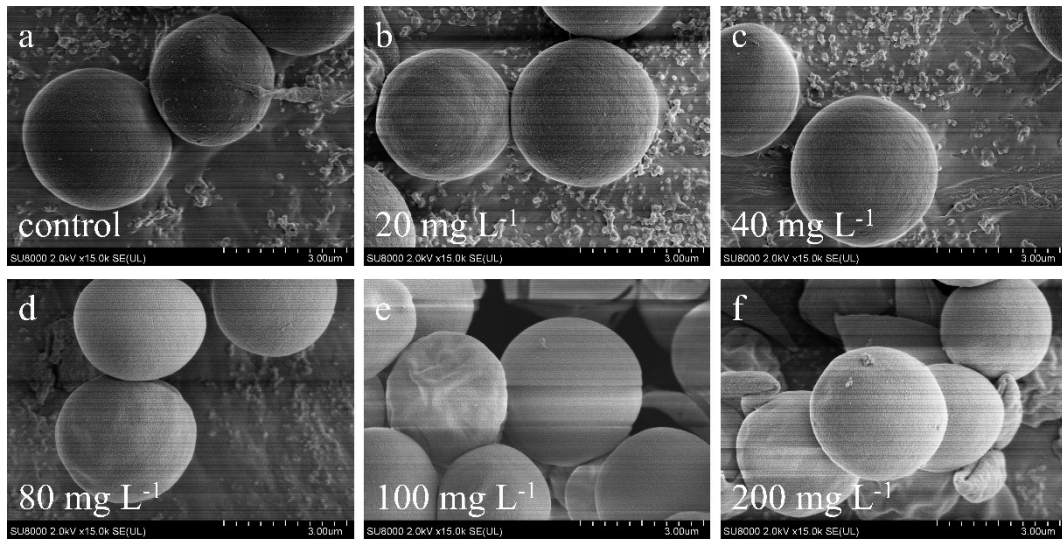

**Fig. S4** Scanning electron microscope (SEM) images of *Chlorella* sp. exposed to different concentrations of 2.5%La-Fe<sub>3</sub>O<sub>4</sub>@PDA for 30 days. (a) Control, (b) 20 mg L<sup>-1</sup>, (c) 40 mg L<sup>-1</sup>, (d) 80 mg L<sup>-1</sup>, (e) 100 mg L<sup>-1</sup>, (f) 200 mg L<sup>-1</sup>. Scale bars = 3.00 μm.

## Notes and references

1. W. Xiong, J. Tong, Z. Yang, G. Zeng, Y. Zhou, D. Wang, P. Song, R. Xu, C. Zhang and M. Cheng, *Journal of colloid and interface science*, 2017, **493**, 17–23.
2. Q. Yin, H. Ren, R. Wang and Z. Zhao, *Science of the Total Environment*, 2018, **631**, 895–903.
3. Y. Zhu, X. Yue and F. Xie, *Adsorption Science & Technology*, 2020, **38**, 254–270.
4. Y. Lu, X. Jin, X. Li, M. Liu, B. Liu, X. Zeng, J. Chen, Z. Liu, S. Yu and Y. Xu, *Polymers*, 2023, **15**, 248.
5. H. Wang, H. Luo, R. Han, W. Wu, J. Yang, T. Qin, L. Chen, M. Liu, B.-J. He and Z. Jing, *Scientific Reports*, 2025, **15**, 3145.
6. H. A. T. Banu, P. Karthikeyan and S. Meenakshi, *Results in Surfaces and Interfaces*, 2021, **3**, 100010.
